## **Fentanyl Deaths Decrease Following Inspection Enhancements at Ports-of-Entry**

Oren Miron, Ben-Gurion University, Israel. orenmir@post.bgu.ac.il.

### **Abstract:**

Fentanyl overdose deaths in the United States surged from 2013 to 2022, primarily due to the smuggling of fentanyl through ports-of-entry. In response, the U.S. enhanced fentanyl inspection at southern ports-of-entry from March 2023, launching extensive operations that utilized advanced cargo scanners. This study found that fentanyl deaths increased by 10% in the year leading up to the inspection enhancements and decreased by 32% in the following year. Following inspection enhancements at mainland ports-of-entry, fentanyl deaths decreased in 94% of mainland states and increased in both non-mainland states. These results support funding inspection enhancements at ports-of-entry in mainland and non-mainland states.

### **Introduction:**

Fentanyl overdose deaths in the United States surged from 3,105 in 2013 to 73,838 in 2022, primarily due to the smuggling of illicitly manufactured fentanyl through ports-of-entry (1). To address this issue, the U.S. launched a series of extensive operations to enhance fentanyl inspection at ports-of-entry along the southern border, starting with operation Blue Lotus on March 13th, 2023 (2). During these operations, southern ports-of-entry utilized Multi-Energy Portals (MEP), which increased the cargo scanned from 24% to over 80%. This study examined the possible impact of these operations on fentanyl overdose deaths.

### **Methods:**

The study searched the mortality database of the Centers for Disease Control and Prevention (CDC) to identify overdoses (International Classification of Disease codes: X40-X44, X60-X64, X85, Y10-Y14) involving fentanyl (code-T40.4) (3). The study extracted monthly overdose death

counts in the U.S. for the year preceding and following the end of the first quarter of 2023, adjusting for the number of days per month. The study employed a linear regression model to predict fentanyl overdose deaths for March 2024 based on data before April 2023 and compared the prediction to the observed count. In addition, the study evaluated changes in fentanyl overdose deaths across states between the first quarters of 2023 and 2024.

### **Results:**

Fentanyl overdose deaths in the U.S. increased from 5,965 in April 2022 to 6,557 in March 2023 (+10%). Subsequent to enhanced inspections at ports-of-entry, fentanyl overdose deaths decreased to 4,461 in March 2024 (-32%). This value is significantly lower than the predicted 7,185 deaths for March 2024 (95% confidence interval: 6,868 – 7,502; P-value<0.05; -38% decrease; Figure 1).

**Figure 1: Fentanyl Overdose Deaths in the U.S. Following Inspection Enhancements**

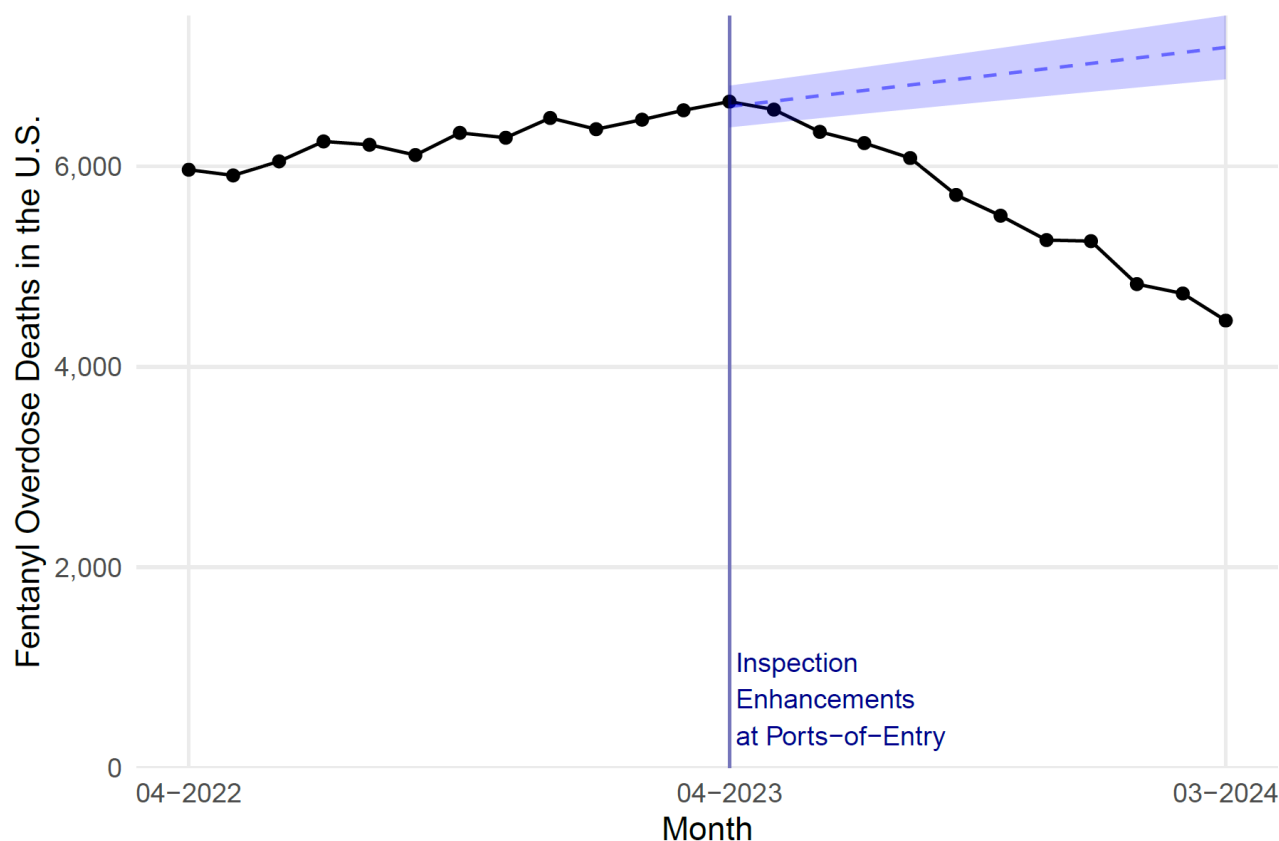



## **Discussion:**

The inspection enhancements at southern ports-of-entry in early 2023 were followed by a 32% annual decrease in monthly fentanyl overdose deaths. This decrease is sixteen times larger than the decrease between 2022 and 2023, highlighting the value of analyzing fentanyl deaths using detailed time series data (4).

While fentanyl overdose deaths fell in most states, their increases in northwest and non-mainland states suggest a need for enhanced inspection at their ports-of-entry. Southern ports-of-entry that received inspection enhancements may still benefit from further enhancements, since they still require more MEPs and inspection personnel to scan more vehicles.

The study's main limitation is the provisional nature of post-2022 death counts at the time of data extraction, although CDC's updates on death counts after a six-month delay are often minimal. Another limitation is that inspection enhancements were gradual and their impact on fentanyl deaths partially depends on illicit fentanyl availability within the U.S. Previous reports suggest that domestic fentanyl availability declined after the first quarter of 2023, coinciding with inspection enhancements (5). It is worth noting that enhancements in drug inspection are often followed by adaptations of smuggling methods, which require additional fentanyl inspection enhancements, along with efforts to reduce drug demand.

In conclusion, the study's findings suggest a significant reduction in fentanyl overdose deaths in the mainland U.S. following inspection enhancements at southern ports-of-entry. These results support enhancing inspections in ports-of-entry in mainland and non-mainland states.

## **References:**

- 1) National Center for Health Statistics. Drug Overdose Deaths in the United States, 2002–2022. 2024. <https://www.cdc.gov/nchs/products/databriefs/db491.htm>
- 2) Department of Homeland Security. Fact Sheet: DHS is on the Front Lines Combating Illicit Opioids, Including Fentanyl. 2023. <https://www.dhs.gov/news/2023/12/22/fact-sheet-dhs-front-lines-combating-illicit-opioids-including-fentanyl>
- 3) Centers for Disease Control and Prevention. Provisional Mortality Statistics, 2018 through Last Week Results. 2024. <https://wonder.cdc.gov/controller/saved/D176/D408F378>
- 4) Centers for Disease Control and Prevention. U.S. Overdose Deaths Decrease in 2023, First Time Since 2018. 2024: [https://www.cdc.gov/nchs/pressroom/nchs\\_press\\_releases/2024/20240515.htm](https://www.cdc.gov/nchs/pressroom/nchs_press_releases/2024/20240515.htm)
- 5) Drug Enforcement Administration. National Drug Threat Assessment 2024. 2024: <https://www.dea.gov/documents/2024/2024-05/2024-05-24/national-drug-threat-assessment-2024>

# Fentanyl Overdose Deaths in the U.S.

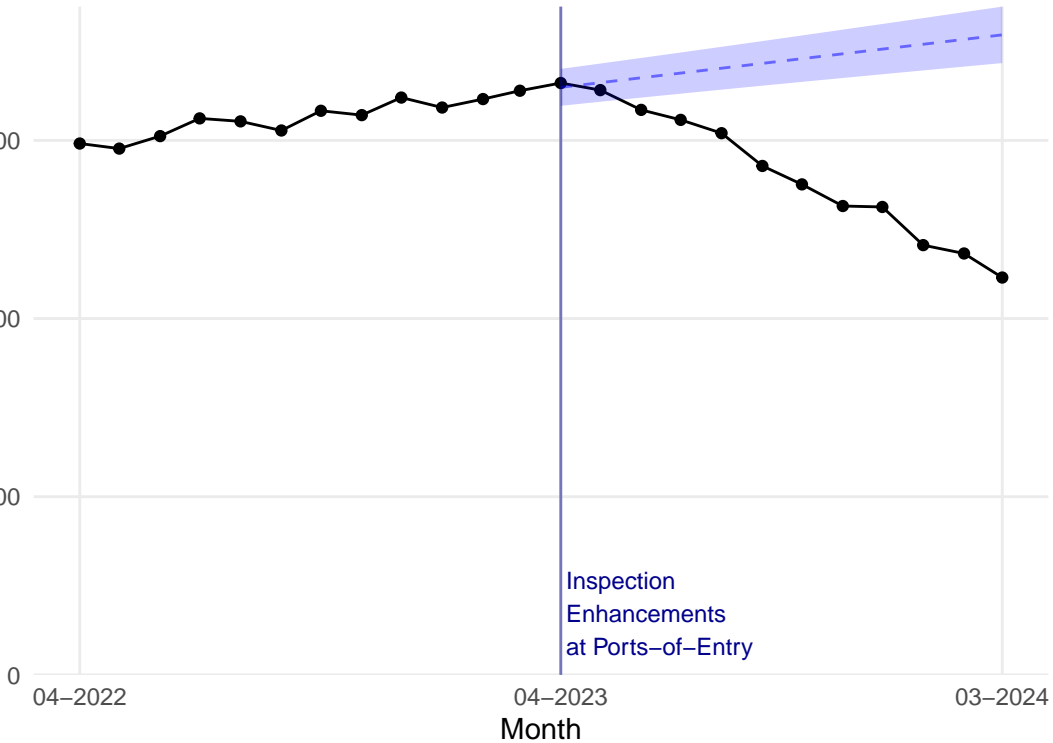

# Fentanyl Deaths Q1-24 / Q1-23

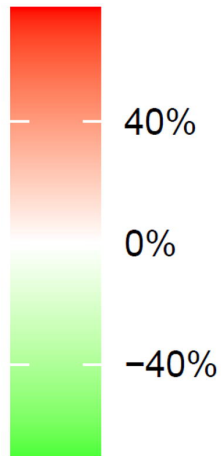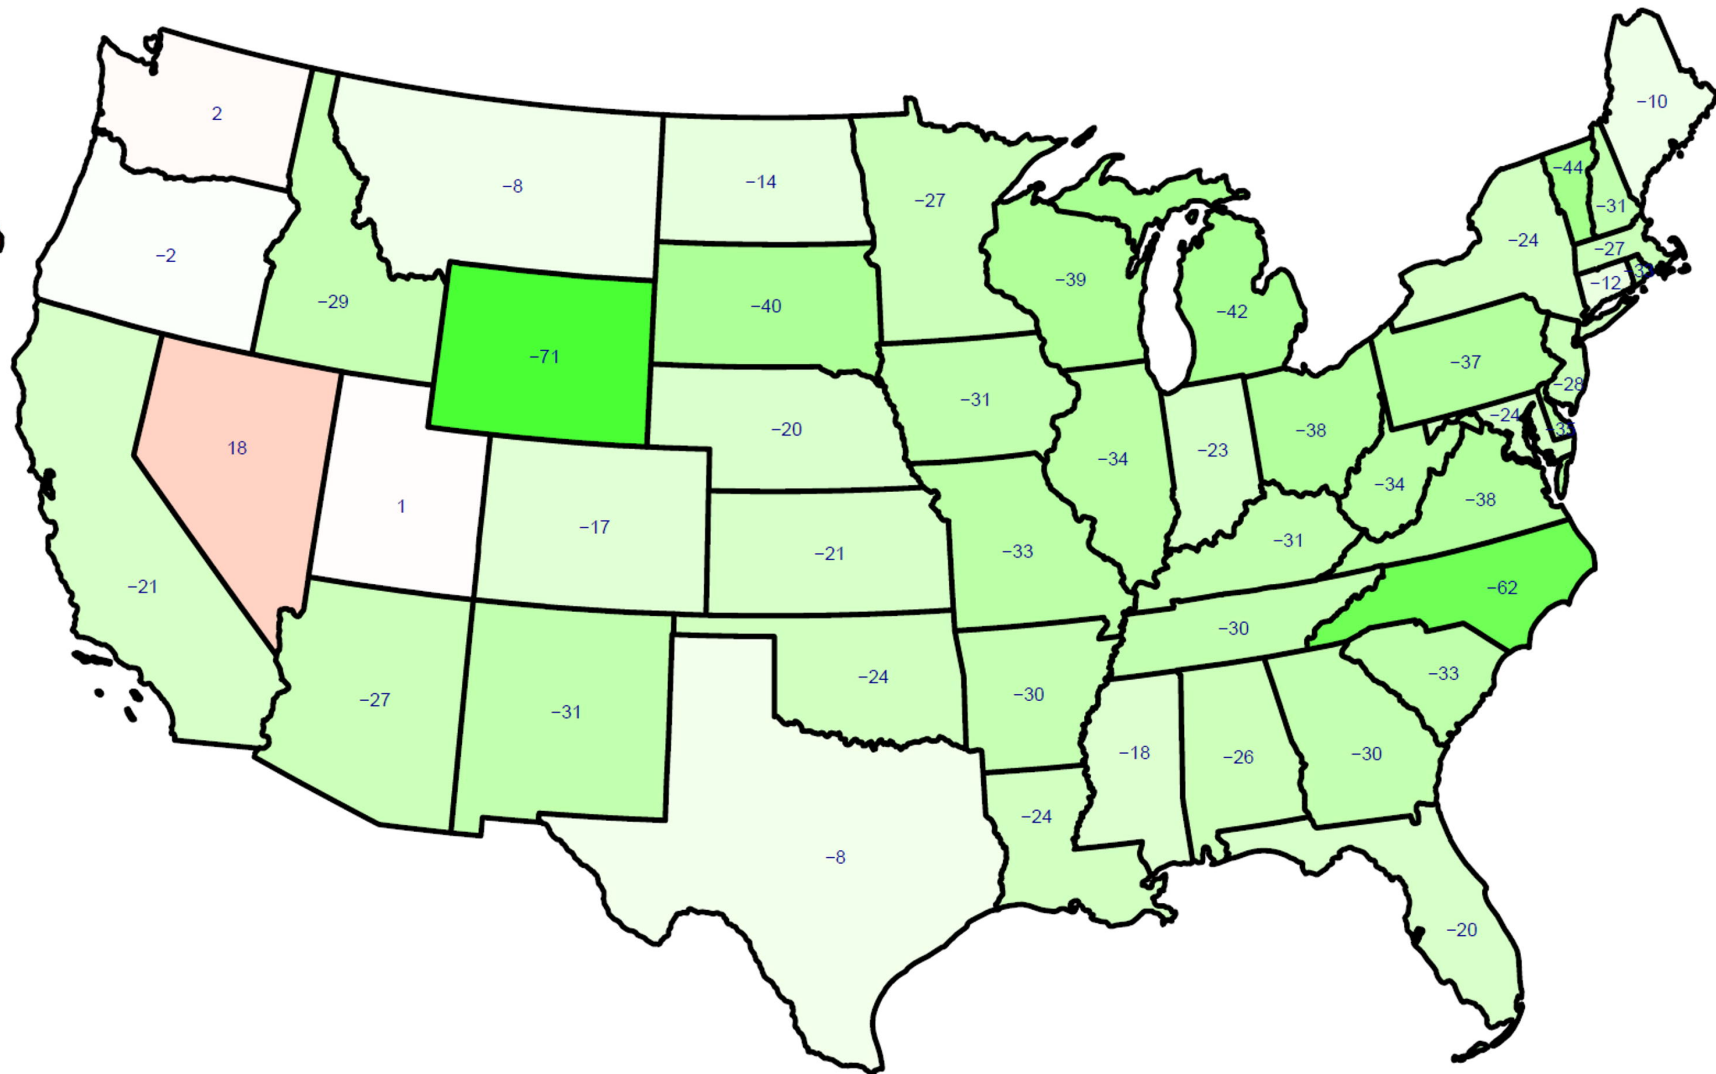

Source: https://medrxiv.org/content/10.1101/2024.10.16.24315583v1.full.pdf
